# Supplementary material
Source: PubMed Central journal article supplement (PMC3804166)

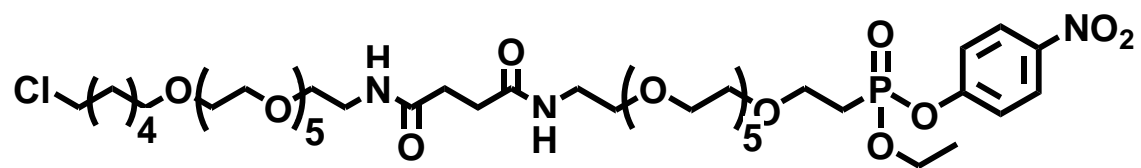

Supplement: NIHMS423410-supplement-linker.pdf [file NIHMS423410-supplement-linker.pdf]
